# Supplementary material for: Shoulder muscle weakness and proprioceptive impairments in type 2 diabetes mellitus: exploring correlations for improved clinical management
Source: PeerJ. 2024 Jun 25;12:e17630. doi: 10.7717/peerj.17630 (PMC11212628; doi:10.7717/peerj.17630)
Supplement: Data S1 [file peerj-12-17630-s001.xlsx]

## Sheet: Sheet1
Group	Age	Gender	BMI	HbA1c Levels	Duration of Diabetes	Smoking Status	Physical Activity	Family History of Diabetes	Isometric Muscle Strength Flexion Dominant	Isometric Muscle Strength Flexion NonDominant	Isometric Muscle Strength Extension Dominant	Isometric Muscle Strength Extension NonDominant	Isometric Muscle Strength Abduction Dominant	Isometric Muscle Strength Abduction NonDominant	Isometric Muscle Strength External Rotation Dominant	Isometric Muscle Strength External Rotation NonDominant	Isometric Muscle Strength Internal Rotation Dominant	Isometric Muscle Strength Internal Rotation NonDominant	Shoulder Joint Reposition Sense Flexion Dominant	Shoulder Joint Reposition Sense Flexion NonDominant	Shoulder Joint Reposition Sense Extension Dominant	Shoulder Joint Reposition Sense Extension NonDominant	Shoulder Joint Reposition Sense Abduction Dominant	Shoulder Joint Reposition Sense Abduction NonDominant	Shoulder Joint Reposition Sense External Rotation Dominant	Shoulder Joint Reposition Sense External Rotation NonDominant	Shoulder Joint Reposition Sense Internal Rotation Dominant	Shoulder Joint Reposition Sense Internal Rotation NonDominant
DM	78.4769	Male	20.7861	8.20059	7.41809	Non-Smoker	1.97095	Yes	67.8431	54.4866	66.6733	48.5212	35.6941	52.909	37.2412	33.0697	17.3819	22.232	6.08215	4.65618	3.29111	5.33272	2.77949	6.42544	4.86664	5.06711	6.32867	3.02236
DM	67.1293	Female	20.7334	7.65656	0.925902	Non-Smoker	2.63165	Yes	51.4671	41.6519	65.3976	78.7575	31.4295	43.6135	26.1081	38.5882	16.8883	18.3012	6.37994	5.19259	3.80125	6.20398	3.50735	3.59662	3.2945	3.2592	5.98756	8.78983
DM	71.9431	Male	29.3647	7.89341	7.51491	Non-Smoker	0.0116144	Yes	55.7525	57.5958	80.3653	85.6113	47.9457	34.7376	30.6277	26.6113	26.3876	12.1142	6.4998	6.55877	7.80697	7.14301	4.82781	5.32697	4.28957	2.87446	5.4007	5.63615
DM	82.4442	Female	25.755	8.11532	8.16413	Non-Smoker	3.50042	No	54.2482	54.5534	62.2331	68.9822	38.7154	52.3345	35.0064	39.0078	30.1664	20.4647	4.62881	3.34504	2.49545	5.7323	5.64566	4.56411	6.5522	5.28802	4.56383	4.80853
DM	79.3381	Female	25.8644	6.44846	7.22195	Smoker	3.83695	No	46.7214	42.0819	64.6814	65.4727	46.0177	49.2374	26.3733	25.7531	29.2876	26.26	3.77484	3.71833	6.32734	7.83795	4.81358	4.85389	3.98769	3.47588	5.3649	3.45353
DM	55.669	Male	30.9889	6.86509	7.93908	Non-Smoker	1.16505	Yes	60.6821	73.6464	84.9046	70.8472	35.4401	44.6555	43.178	39.8615	27.5979	6.9842	1.31859	5.32132	4.23578	5.27708	2.83897	4.4574	3.34818	6.26677	4.0066	2.42491
DM	71.7047	Female	21.6635	7.97183	6.28472	Non-Smoker	1.77351	No	68.5607	55.0155	66.6345	57.9736	40.7085	25.5573	26.8604	30.2871	30.5633	18.9643	2.57754	2.53573	4.64033	6.79867	3.76403	3.34128	4.90648	4.21201	3.88786	5.19393
DM	62.5407	Female	23.3392	4.94617	2.28113	Non-Smoker	0.780023	Yes	51.9925	70.5235	89.429	66.0502	35.0866	38.9484	30.096	23.6483	22.3264	36.934	3.7493	4.20453	6.81104	5.98445	3.79582	7.3052	5.53286	4.51473	3.64013	4.6755
DM	62.9412	Male	24.802	8.53146	5.31375	Non-Smoker	3.24103	Yes	49.5269	64.4084	65.2645	64.744	47.4479	30.22	25.3055	18.3535	24.1247	26.2105	3.83847	3.74064	7.0111	7.88241	5.09789	4.59832	5.92993	3.10861	4.8969	5.54267
DM	67.2162	Male	26.8291	7.70569	3.47403	Non-Smoker	0.494493	No	49.0561	48.5569	80.4891	70.5442	39.0837	35.9905	17.5984	27.4889	29.8517	23.4117	4.14526	5.42156	6.01909	6.24372	3.83176	5.10885	4.25263	8.41972	4.30198	5.79772
DM	64.9984	Male	26.2516	7.19069	3.51523	Smoker	1.80294	No	35.7889	46.5773	49.2337	48.9826	34.9153	39.9294	44.3131	27.7997	28.1258	16.6519	3.00898	4.40941	1.63122	3.67091	3.92111	3.73844	4.97803	6.4603	4.26531	6.22645
DM	75.8996	Male	25.2165	7.41964	2.45818	Non-Smoker	0.810085	Yes	50.5855	46.6554	67.9387	59.3556	27.0457	38.5486	30.7446	35.4521	24.4782	17.0509	2.21166	7.67092	8.45051	7.31865	5.86322	3.70465	5.29347	4.3306	6.30688	4.81348
DM	70.1318	Male	26.1693	6.34426	7.94797	Non-Smoker	2.22949	Yes	54.2861	34.0159	49.9665	72.7001	43.6118	32.87	29.0931	28.8002	33.1589	21.0853	4.1755	6.23677	7.93419	5.8797	6.13885	5.4875	5.39623	5.57916	3.69316	5.70349
DM	64.8123	Male	25.9761	6.92905	6.81327	Smoker	-0.648998	No	61.2226	44.0649	75.0817	57.6919	35.1096	50.1241	30.7827	26.5892	18.3444	32.5174	4.09618	3.83666	5.52104	5.29973	4.2154	5.62746	4.22374	7.27848	5.4645	4.3239
DM	67.4929	Male	23.3861	8.17624	5.06587	Non-Smoker	4.21928	Yes	60.4052	52.4163	53.8089	54.5555	41.0937	20.8192	41.7567	36.9592	22.7291	24.8067	3.26788	4.461	5.36031	7.48425	5.13739	6.05985	6.43847	4.01465	3.91803	3.72906
DM	66.5762	Male	22.991	8.3463	4.42212	Non-Smoker	0.645214	Yes	48.5256	63.75	69.2842	84.5153	36.9815	44.7669	25.5866	28.0154	24.0631	15.7368	3.35552	4.51424	8.90687	5.57249	2.60037	6.33764	4.08645	8.12457	2.6016	4.41683
DM	76.2307	Male	27.5912	9.54875	6.42505	Non-Smoker	2.24344	Yes	49.731	43.3832	63.4321	64.7362	49.4742	19.2266	36.7375	25.6012	30.2998	29.6286	3.09019	9.41081	7.2155	6.71798	4.88816	4.72144	5.45371	3.86335	2.80608	5.90042
DM	62.0931	Female	22.6614	7.16642	9.95342	Smoker	1.81846	Yes	61.8193	58.045	54.3742	58.6461	45.9314	41.3362	29.2567	33.5076	25.6835	19.6662	3.81866	2.95633	5.282	5.03489	5.97898	4.43363	4.73853	5.10283	3.95539	5.68271
DM	66.4047	Female	21.5344	6.66364	0.0865097	Non-Smoker	0.961101	No	50.623	39.132	49.6058	47.6563	45.0939	28.8063	28.0846	26.1949	18.5173	33.158	3.20255	5.25274	4.76117	4.95156	5.24946	5.89858	4.18453	2.96695	5.33442	4.8531
DM	56.6939	Male	25.109	6.78776	7.706	Non-Smoker	0.765063	Yes	47.7184	45.0352	61.0658	71.5586	35.9067	46.2289	35.9747	34.086	28.5844	17.8084	6.03823	2.18686	4.9568	8.20702	4.78117	4.19595	4.13001	1.67916	5.3494	5.30205
DM	42.5591	Male	25.7631	6.35448	4.75372	Non-Smoker	3.61078	No	64.1374	46.1753	84.3481	71.2605	45.2587	38.4133	38.8303	25.4592	31.8364	14.8479	4.67294	4.9707	7.67092	5.01195	4.24249	6.05226	4.18538	6.82463	4.26395	7.02406
DM	69.2381	Male	35.9759	7.16304	0.469325	Non-Smoker	1.33	Yes	61.0744	53.5242	63.3154	61.4112	56.0461	40.0049	28.6457	28.0283	29.8619	22.834	3.04709	7.53925	7.39918	5.26073	3.95853	5.44064	4.32207	5.48427	5.32066	2.45477
DM	70.9921	Female	23.4491	7.55915	0.27375	Non-Smoker	2.57303	Yes	52.2822	54.2818	75.8341	53.481	34.0399	27.5096	26.9172	30.6055	29.1806	28.3102	3.9742	4.43267	2.14542	3.87877	4.47301	6.40068	3.76149	2.8459	4.6538	3.18821
DM	57.6252	Male	30.42	7.20055	3.57909	Non-Smoker	0.899665	Yes	46.9957	58.7563	65.7602	64.1177	42.719	31.0994	24.2035	26.9898	15.0426	28.6839	2.76842	6.4601	6.25999	7.98488	2.96341	5.80458	5.44346	2.98113	4.23837	4.85253
DM	82.6844	Female	29.5906	8.17286	7.20243	Non-Smoker	1.1404	Yes	34.7575	57.0596	75.4154	56.1101	26.9808	39.6052	39.6118	29.4676	20.5676	22.7293	5.70631	4.89141	7.05096	6.46954	6.4415	3.68303	4.07055	7.02077	5.61132	5.80848
DM	51.6997	Male	21.4008	7.02857	7.7578	Non-Smoker	2.88671	Yes	57.2091	52.3845	47.4597	55.0615	53.3136	43.3198	28.2298	35.1623	28.4034	14.9507	6.20481	4.41385	2.3572	6.27247	5.29063	3.91527	4.15728	5.14164	6.02111	4.58153
DM	64.1807	Male	29.7009	6.93119	3.49526	Non-Smoker	3.60144	Yes	44.3843	53.6886	62.181	63.3413	37.792	66.4702	19.5929	32.3808	25.3588	18.2238	6.02768	4.64278	5.33413	7.17942	4.55732	5.88096	5.23892	7.43559	5.80971	6.08014
DM	62.2426	Male	21.4222	6.73011	9.75447	Non-Smoker	1.87651	Yes	35.1816	64.3044	76.1669	53.9828	47.9915	39.7596	41.6895	32.8643	28.6329	7.96605	2.81611	4.19355	1.82145	4.34492	3.98821	7.32568	4.6542	6.28305	4.18255	0.840034
DM	76.5527	Male	15.1817	5.82593	11.0535	Non-Smoker	-0.068195	Yes	65.797	45.7032	64.6619	66.7944	26.3413	47.1935	22.8424	25.1946	18.4898	15.459	4.2277	4.14108	5.5964	5.31451	4.59263	3.35294	3.36653	5.26348	5.25828	1.74717
DM	76.0251	Female	28.9947	5.88172	7.76748	Non-Smoker	5.26681	Yes	57.712	57.0941	65.4561	70.3609	56.7607	22.1931	37.4147	35.4189	25.3213	20.4401	3.8119	3.19754	1.2152	5.86753	5.54757	5.00855	3.84271	5.40688	1.94103	4.10914
DM	65.0892	Female	19.0026	6.21592	4.60751	Non-Smoker	0.813783	Yes	42.2904	34.2098	61.899	56.0728	38.1466	24.434	33.3736	34.1599	17.7899	24.2874	5.1031	6.99911	3.99014	4.07538	5.78259	5.32646	4.56737	4.55514	4.79993	8.44421
DM	66.9463	Female	28.3375	8.34923	10.0981	Non-Smoker	-0.254876	No	41.6397	53.8744	78.2346	50.8554	45.9445	34.0513	34.0821	36.4604	14.5926	19.3485	2.9994	4.45328	4.13009	7.59306	3.67594	3.10329	4.19651	5.50179	5.00403	4.86991
DM	56.4136	Female	23.5366	7.99992	8.91727	Smoker	6.1973	No	59.6364	45.9484	69.4263	79.7698	42.5331	25.7414	28.1679	24.5699	27.3471	21.2637	3.44431	5.37366	3.93648	5.95733	3.59912	5.56809	5.49547	5.27157	4.74693	1.86646
DM	47.3198	Male	33.4499	8.41247	9.2757	Non-Smoker	1.51971	Yes	44.5431	50.2528	66.8052	55.0795	39.0227	52.2308	34.6087	28.3752	30.4475	18.9639	3.79629	3.80545	8.21403	5.58235	6.95605	4.86546	4.01089	6.5744	4.2866	4.38756
DM	60.9054	Female	30.9498	6.0843	4.39932	Non-Smoker	-0.130303	Yes	63.3058	59.4452	72.9992	57.8464	55.7952	33.5111	20.8225	33.9124	27.0626	26.742	4.55541	6.47677	6.40031	6.27056	5.92025	2.40123	3.81222	5.12304	6.16487	5.69744
DM	65.1008	Female	24.5122	5.53698	2.57057	Non-Smoker	1.08383	No	57.44	51.6887	72.4322	66.4625	26.9909	51.2021	36.1169	25.3774	25.4829	15.554	5.28013	4.61344	4.54885	5.05432	5.44937	6.97473	3.76966	6.55416	4.44532	6.15938
DM	74.036	Female	23.5204	6.66235	13.2737	Non-Smoker	2.72337	No	56.7508	58.0728	68.5482	70.2758	43.8109	52.2345	42.6865	28.0065	16.8134	27.3286	3.9095	4.85802	3.49251	6.03549	4.51749	3.91825	5.15852	6.69492	4.38837	5.50054
DM	73.8038	Male	21.2945	7.3812	1.34519	Smoker	2.44689	No	55.6125	63.2876	82.3463	61.8302	49.098	37.9822	38.1237	42.7903	31.3746	34.9448	5.23971	2.52917	4.86722	10.1959	5.68642	3.40252	5.2338	5.62211	4.26365	4.55402
DM	60.5774	Male	24.5649	7.65887	6.38554	Non-Smoker	0.821302	Yes	53.7722	53.6774	65.7266	68.908	40.972	42.5128	18.4375	42.9686	25.4203	24.8555	5.45158	5.51061	3.30236	6.72376	3.26944	5.49677	3.121	3.4562	5.83195	5.77958
DM	61.2848	Male	25.2441	8.13126	14.1184	Non-Smoker	4.99345	Yes	59.7188	60.6054	69.2254	60.4023	40.209	37.0063	25.4571	38.0784	36.7807	18.0763	4.06429	7.40742	7.2667	8.03202	6.35495	5.66571	5.36963	5.12731	4.20027	6.41585
DM	55.076	Male	24.8873	7.47448	7.55785	Non-Smoker	1.33634	Yes	48.2013	47.3367	59.7019	54.7745	39.9972	42.8744	30.8568	36.0081	31.0129	18.0141	2.68082	3.81544	9.2936	5.54325	4.63065	5.88579	5.60375	2.59619	3.53375	4.12666
DM	51.9855	Female	27.0929	8.7287	9.53759	Non-Smoker	0.301889	Yes	52.8618	50.1573	67.9022	78.4377	30.6232	42.3306	35.4314	22.5577	14.3009	29.8527	2.7806	4.36597	7.42534	5.05557	5.53995	4.50522	3.10282	3.6104	4.42623	4.70437
DM	49.6038	Female	28.8771	7.03856	1.69233	Non-Smoker	3.64868	No	58.6093	45.5996	82.7675	88.9209	41.5594	36.3396	31.4069	33.0813	29.9511	14.0117	5.14291	3.45465	5.99675	6.36094	5.38084	4.96658	4.08338	6.41911	6.66049	4.68763
DM	80.0305	Female	27.909	6.44475	0.811466	Smoker	4.22334	No	56.9786	59.4708	59.6987	81.0992	45.6599	42.5441	28.786	27.0929	17.7516	15.1832	3.71186	5.15308	5.01206	4.3297	4.52527	4.08111	6.16031	6.07759	4.19016	2.58457
DM	59.5597	Male	23.1977	5.78415	4.79535	Non-Smoker	0.874711	Yes	41.8073	53.8988	54.6287	65.7596	41.8227	54.5729	36.1661	22.2876	21.3637	13.755	2.05508	5.06579	4.53789	3.14244	4.4771	3.36846	5.74598	5.35535	5.3174	3.18549
DM	60.1552	Female	20.3481	6.46548	9.9904	Non-Smoker	-0.0361018	Yes	47.8015	45.7359	76.6565	82.456	38.8775	44.5975	40.0229	26.0631	24.2482	12.9817	5.17136	5.92481	8.79566	6.87986	6.01374	6.30733	4.7843	4.92147	4.21792	1.76304
DM	53.3767	Male	32.202	7.43822	5.392	Smoker	3.75748	No	54.3017	51.6004	64.8118	67.8708	36.9988	40.7756	30.555	30.3546	25.1367	14.5661	4.5236	5.71897	4.19965	6.76885	5.79915	4.8536	5.25122	4.28787	4.2196	4.98301
DM	70.2687	Male	23.5136	6.4657	3.95716	Non-Smoker	-1.04382	Yes	48.5988	59.4583	67.3427	59.6492	38.8169	38.7915	37.0721	25.7997	27.9242	27.0056	2.466	3.89123	8.43098	7.00564	2.72055	4.75575	6.82978	4.61642	3.87017	4.47112
DM	50.3724	Female	23.6708	8.0356	7.1335	Non-Smoker	0.23647	Yes	67.4353	49.8821	65.8835	68.9632	52.0969	27.5649	14.644	25.776	19.8704	29.1235	5.93042	5.28143	3.09955	6.01465	2.80835	2.5209	5.25274	6.75961	3.06395	4.4157
DM	62.03	Female	24.2254	8.4446	9.96219	Smoker	3.65922	Yes	48.7271	41.8225	67.1681	63.4283	23.2015	27.4206	25.7737	35.0013	19.1456	16.9238	5.47109	4.54008	4.75346	8.4134	3.62916	4.7606	3.56361	6.05118	4.42497	4.8239
DM	56.3497	Male	18.6338	5.19216	1.87619	Non-Smoker	2.06365	Yes	50.7201	51.3987	75.1445	54.6566	41.5762	40.7515	29.9519	30.55	29.0754	23.0557	4.53592	3.51802	1.94617	5.87259	3.6871	3.94373	6.09764	3.37174	5.4437	5.56582
DM	67.019	Female	24.4082	7.97308	2.62626	Non-Smoker	1.73826	Yes	58.7602	32.6822	57.6735	55.4936	38.3982	24.0441	28.8175	31.1639	25.5949	26.7971	2.64241	4.81001	5.65528	5.29862	3.43962	4.76523	3.90648	5.64834	6.49872	3.96874
DM	59.5501	Male	24.4011	5.30394	3.97626	Non-Smoker	2.70039	Yes	54.9725	57.0413	55.8883	72.2763	53.8082	29.9963	34.3864	30.3286	26.6587	22.3318	2.47088	10.0742	2.83782	2.28201	4.96932	4.71033	5.73402	5.56295	5.1035	6.44264
DM	53.9771	Female	29.0541	7.57529	10.0028	Smoker	1.91167	Yes	50.8663	46.497	67.2286	46.1347	41.7095	50.2085	39.0032	24.9179	13.2318	15.1755	3.93853	8.08233	8.6368	5.92199	4.15993	4.43085	5.40315	7.75058	3.55526	2.73641
DM	63.5655	Female	29.3845	8.28339	7.25143	Non-Smoker	0.124049	Yes	45.5915	46.0719	49.7394	70.3228	54.0598	56.4534	35.5652	20.1442	24.6656	11.6807	2.05335	5.16737	6.1563	7.00321	5.99674	6.13477	5.63172	2.81155	5.47697	4.85171
DM	67.3637	Female	26.446	7.28578	13.3229	Non-Smoker	4.14068	Yes	54.7221	57.9887	52.1526	48.276	22.8796	21.117	27.9113	31.6936	20.6196	28.5007	4.89281	7.31007	6.40405	5.98844	6.26817	5.52988	6.27011	4.22446	5.11846	4.73822
DM	64.3534	Female	30.3717	6.12947	9.49663	Smoker	4.21702	Yes	61.0874	38.1347	85.6515	43.424	45.2008	53.615	21.8056	26.0767	20.45	25.0141	2.4595	4.91919	5.8997	7.36279	4.63845	6.3664	3.3234	6.77176	6.27999	6.00884
DM	66.3166	Female	27.8681	6.72653	6.3877	Non-Smoker	2.47032	No	56.2546	67.4813	74.1822	46.2106	43.6497	35.4731	35.9062	15.7459	30.8974	25.5618	4.57098	4.90879	3.17677	8.8027	6.5218	3.35046	4.6918	3.74915	7.13022	4.20672
DM	58.5224	Male	26.3637	7.00498	10.5482	Non-Smoker	2.22041	Yes	45.4043	45.9751	66.246	83.772	53.2442	37.4119	19.6672	26.8631	19.4575	14.1402	3.9639	2.36757	5.58575	5.76678	4.69664	4.18178	6.66713	8.81915	6.05397	6.3021
DM	60.782	Female	27.1107	7.07327	7.17679	Non-Smoker	5.79981	Yes	67.1084	45.594	79.151	62.4232	27.0487	36.4406	36.5576	22.0565	19.4733	23.2431	5.30379	3.69346	8.97742	7.49444	4.19173	4.93045	5.71685	3.65053	4.07691	4.55662
DM	58.2051	Female	25.6235	7.05551	4.24425	Non-Smoker	1.71876	Yes	39.636	59.2781	55.5902	65.2146	39.8905	48.225	30.8523	34.3597	23.7932	25.9146	3.09315	3.93011	5.35694	4.0294	4.74126	4.47983	4.93362	5.40223	4.36415	4.73358
DM	60.8085	Male	24.7598	7.1355	8.67592	Non-Smoker	1.74506	Yes	38.4614	56.509	63.0867	78.368	41.8008	21.6922	24.1578	33.1436	28.2231	23.7791	4.7168	5.12408	3.32631	7.24852	5.70935	4.88251	3.75729	6.17134	5.98427	4.67024
DM	57.0346	Male	25.2975	7.41359	4.27175	Non-Smoker	2.71859	Yes	60.4096	71.9479	72.7965	73.5804	36.9463	42.0623	34.0776	32.9737	20.6576	16.5987	2.48091	4.99874	1.67236	6.05809	2.89409	3.52601	4.86459	6.6375	3.93554	5.80545
DM	49.4373	Male	21.6585	6.19063	5.57073	Non-Smoker	4.44526	Yes	54.069	48.3587	75.5595	50.6258	51.7412	28.2341	32.1105	24.9912	32.6676	28.5131	5.41604	4.20422	3.92761	5.70769	4.44054	4.0991	3.86636	6.39705	4.38721	6.01322
DM	65.2762	Female	27.6163	7.02186	10.7489	Non-Smoker	4.63472	No	47.3778	49.1632	71.6536	72.9371	38.3038	43.1937	31.8819	34.5858	33.8906	11.2927	4.19595	4.19099	1.85079	5.77902	4.99715	2.96089	3.321	4.68999	5.34024	4.05965
DM	60.4572	Male	22.2291	8.5357	6.1759	Non-Smoker	1.74663	No	42.6393	37.1233	40.0736	66.1779	58.8103	52.7874	31.559	31.756	20.6722	27.9469	5.01444	4.75735	6.98442	5.78775	5.06939	3.88527	5.32495	6.68415	5.87685	2.98209
DM	50.2367	Male	29.9901	6.8992	3.92995	Non-Smoker	2.631	Yes	72.1485	47.2876	56.34	60.9876	50.3381	37.5559	34.9744	26.7443	24.2804	28.9796	2.5805	3.12891	6.88671	5.60017	4.26472	5.83384	4.824	4.26575	4.83418	3.55532
DM	67.6503	Female	25.3748	6.8483	5.01412	Non-Smoker	0.000189791	No	53.1305	43.8381	71.2829	64.5998	49.4452	41.2529	38.3977	26.4456	21.2549	32.3104	5.01877	4.15906	3.60615	6.22437	5.20766	4.71653	4.00196	4.58428	1.0022	5.09135
DM	56.2513	Male	26.6394	8.15725	9.76973	Non-Smoker	1.66332	Yes	56.7302	46.2539	62.6695	76.9917	46.0623	41.6023	35.4971	35.6929	16.1139	19.3279	4.76031	4.46907	6.55568	5.76562	4.99133	6.83208	5.14705	6.02213	4.97742	4.84769
DM	64.2322	Male	28.5189	5.0291	4.73187	Smoker	0.839147	Yes	54.8633	34.7765	92.616	55.6155	32.0397	29.668	38.9923	26.3063	27.3881	14.8739	4.83736	3.30641	4.19862	4.55838	4.0189	4.24749	4.26619	7.54889	4.17618	5.05885
DM	69.866	Female	29.1512	8.24599	5.26201	Non-Smoker	0.579342	Yes	55.8724	64.943	75.9306	68.3167	37.5053	52.4799	31.8307	31.6461	29.8295	27.0325	4.76893	4.53748	5.24968	6.49298	7.06976	5.12646	6.50397	5.02915	3.35962	3.89827
DM	64.8731	Male	19.7863	6.68656	4.86706	Smoker	4.77326	Yes	56.781	37.6789	72.1206	64.2647	46.1786	54.4028	43.1032	36.6633	37.0773	16.9093	4.09076	3.86136	6.07647	5.23232	5.15351	3.4877	4.73004	4.069	4.58968	5.93629
DM	73.2798	Male	25.5548	7.37098	7.08856	Non-Smoker	0.914033	Yes	58.4408	25.4025	54.8007	46.622	47.0841	44.4866	36.0021	42.6772	20.5817	21.9483	6.01334	6.63541	4.46096	7.26902	4.3057	8.17883	6.30555	7.11417	5.93817	4.63357
DM	53.5262	Male	30.1532	7.31284	5.26643	Smoker	1.32069	Yes	48.8818	39.7006	65.985	56.4418	52.5241	38.2833	28.4438	40.9908	33.2465	19.4976	4.1411	4.6533	6.16804	5.93839	4.04111	4.7603	3.96345	3.52604	3.17025	2.6812
DM	67.1475	Male	19.247	8.04052	1.37412	Non-Smoker	2.72072	Yes	49.6031	44.88	68.844	66.267	37.1913	33.0011	24.7134	35.7487	33.2811	15.534	3.35951	4.72601	2.00226	6.13624	5.80235	6.00044	5.36108	8.02536	6.51561	5.07817
DM	58.1024	Female	28.0682	6.99987	3.66102	Non-Smoker	4.17461	No	37.095	40.045	78.0113	77.1648	33.7983	31.3765	33.5253	19.2144	26.7918	23.8264	4.27131	5.55356	5.5726	3.45944	4.78227	5.48846	6.56683	3.93308	5.76384	5.60355
DM	56.555	Female	16.889	6.6469	3.51508	Non-Smoker	2.90054	No	45.386	59.961	75.4609	74.2431	48.6527	54.446	23.2718	24.8262	29.0843	12.2121	3.07631	5.72634	5.27079	4.43428	7.47292	4.26183	5.02567	6.28938	5.70902	5.06264
DM	58.984	Female	22.1048	8.34615	10.4786	Non-Smoker	6.45459	No	54.4597	49.0087	77.0311	70.2545	34.2348	51.5203	25.5305	25.7946	30.6215	25.6652	3.72824	2.65344	1.28814	7.13573	4.19048	3.34299	5.87372	6.7037	3.55791	5.0445
DM	61.2079	Female	26.5934	5.19681	9.10056	Non-Smoker	2.03352	Yes	61.1386	50.4549	56.7967	56.3132	48.7754	36.9317	33.751	40.9171	36.8631	15.0942	4.11249	4.47511	1.75681	5.07741	3.30313	5.17206	3.05643	6.4983	4.25097	5.17441
DM	64.2673	Female	19.4221	7.24749	8.37923	Non-Smoker	2.5536	Yes	57.2897	55.6381	80.9516	82.138	51.5957	21.9661	28.0085	24.7557	28.3792	9.90886	3.8414	3.7619	1.65814	5.3251	4.63953	4.29515	5.45299	5.68915	4.08911	3.458
DM	54.106	Male	22.2613	6.07078	4.88285	Smoker	2.57994	Yes	49.1798	52.7641	52.0763	66.4844	45.1712	9.60804	25.8021	32.213	25.329	21.3103	4.61719	4.78547	6.16033	5.63813	4.86257	4.78873	4.78978	5.43182	4.56042	6.92255
DM	71.2949	Male	20.2041	6.57505	3.88947	Non-Smoker	4.38868	No	41.2188	58.9001	60.8086	54.4272	38.1405	26.8666	31.8963	30.253	20.7588	24.5765	6.95732	4.26131	5.58544	7.6574	2.3397	5.7811	5.5097	2.96289	4.48349	4.4325
DM	67.6743	Male	33.4016	8.95968	4.87594	Smoker	2.94129	Yes	28.1514	40.4	70.8042	62.5547	41.585	36.2708	32.6228	23.1357	27.4012	25.5616	5.11507	5.19047	5.88244	6.44019	4.32991	5.07624	5.61031	4.22781	4.16966	6.83557
DM	51.0185	Male	27.1247	7.19165	3.13398	Non-Smoker	1.96868	Yes	62.0595	45.379	64.8001	73.206	46.3575	51.3848	30.7344	32.1831	31.477	27.1984	5.78688	3.66618	2.71377	7.59163	4.26474	5.44385	2.54887	6.41073	4.34115	4.12747
DM	76.1823	Male	28.8296	7.39776	14.491	Non-Smoker	0.671918	No	47.035	56.1305	55.9476	64.4352	41.318	31.1282	29.5702	32.2963	27.0569	5.69232	3.67503	4.21919	7.59517	5.65067	4.26436	5.16456	4.32527	6.32189	4.29971	6.16534
DM	79.5738	Male	25.4881	5.69786	0.685029	Non-Smoker	2.53133	No	48.2497	27.7738	57.8552	73.1134	60.2233	42.5425	37.9245	20.9328	21.2478	14.8351	3.5634	4.18785	7.28603	6.24221	3.97675	3.17528	4.10338	3.85507	4.88901	5.19184
Asymptomatic	71.3947	Female	23.6235	5.09464	N/A	Smoker	7.11507	Yes	42.6905	27.8572	45.099	61.4712	28.2995	44.1959	30.9795	33.1718	20.7351	19.5323	2.04502	3.52351	1.88487	2.01854	0.903315	2.69783	1.13804	1.56797	1.4649	2.61919
Asymptomatic	61.7071	Male	19.026	5.52042	N/A	Non-Smoker	2.98433	No	30.8853	44.1236	64.7572	55.1568	28.2101	33.906	27.2788	7.16003	19.4977	28.303	3.00525	2.88752	2.75923	3.09011	1.61773	2.57672	0.614867	1.53569	2.17057	2.00611
Asymptomatic	55.3555	Female	23.8477	5.59319	N/A	Non-Smoker	5.12599	No	38.9937	35.6162	71.6424	43.8578	28.4021	31.5322	44.8567	18.9166	21.7311	23.7371	0.664468	2.88831	2.11708	2.60889	1.16149	1.30511	0.827373	2.04531	2.5701	3.27143
Asymptomatic	70.5082	Male	22.1382	5.71377	N/A	Non-Smoker	4.48122	Yes	57.2203	47.8961	58.7813	52.7764	31.2876	21.3152	30.0077	31.1997	10.8073	30.6773	1.53413	2.30518	1.43071	2.57986	1.01194	2.20792	1.35048	1.30774	2.36393	2.80719
Asymptomatic	60.1153	Male	28.0328	5.43397	N/A	Non-Smoker	5.88882	No	45.5614	46.7956	55.9467	51.9656	19.447	22.2463	36.1433	14.181	23.353	15.6101	2.41982	2.2176	1.49529	2.71224	1.10162	1.56589	1.14422	1.27325	1.69785	2.50675
Asymptomatic	71.706	Male	29.0636	5.67242	N/A	Non-Smoker	2.08516	No	44.439	29.3925	45.8165	68.2569	30.9891	36.425	25.0712	26.3131	23.606	20.5741	2.16521	3.05929	2.56018	3.21106	1.19941	1.5192	0.827996	1.13603	2.35472	3.27235
Asymptomatic	64.475	Female	30.2483	5.63874	N/A	Non-Smoker	9.27036	Yes	29.5264	43.3057	68.3598	36.9556	30.813	31.0201	19.8264	13.3706	22.7523	12.0392	3.87483	3.25192	2.18318	2.46348	1.39694	1.92734	1.0367	1.11025	2.76558	2.61226
Asymptomatic	69.9534	Male	28.0133	4.58832	N/A	Smoker	1.00351	Yes	58.9109	50.1987	80.6268	50.3493	36.2649	33.8534	23.5619	22.8288	20.2087	16.359	2.68919	2.57348	2.62655	3.30837	1.58724	2.89122	1.37457	1.57748	1.92996	3.86379
Asymptomatic	65.5309	Male	22.7309	5.44702	N/A	Non-Smoker	3.08654	Yes	30.7529	41.0583	42.744	46.3148	38.7926	32.3658	26.9872	5.37374	9.99034	14.3038	1.82349	3.57607	2.19023	2.17681	1.03592	2.51188	0.640108	1.21052	2.24794	3.15984
Asymptomatic	68.0279	Female	20.8481	5.78324	N/A	Non-Smoker	6.05885	Yes	56.4435	31.3054	49.6806	54.5692	26.4404	38.5979	25.4922	16.9374	20.1204	14.9329	1.10947	3.694	2.35045	2.74998	1.19704	2.26287	1.04714	1.8154	2.7688	2.36488
Asymptomatic	63.0649	Female	27.7007	5.70134	N/A	Non-Smoker	4.59655	No	25.4364	47.4043	53.3078	29.6707	42.3854	25.9061	37.48	11.4326	26.2443	16.4267	2.07436	1.07842	3.18559	3.46415	0.902527	1.29717	1.04258	1.23672	2.35	3.36145
Asymptomatic	75.7233	Female	26.2069	5.26262	N/A	Non-Smoker	5.81237	Yes	52.4732	45.2891	54.3972	61.572	49.1067	29.8403	27.9549	20.4021	15.3531	18.8869	1.32349	2.94304	2.85858	2.33958	0.206618	3.33495	1.14674	1.97156	2.52174	2.59591
Asymptomatic	63.8949	Male	18.4725	5.05941	N/A	Non-Smoker	2.78889	No	54.1067	44.4844	61.8784	51.6835	34.1283	49.3906	31.758	20.2963	8.95084	19.0079	2.70407	2.52208	2.03523	2.67037	1.41297	2.41055	1.22594	1.59203	1.64858	3.74348
Asymptomatic	65.8562	Male	26.204	4.91558	N/A	Non-Smoker	3.74944	No	35.3485	45.9872	74.9847	34.9946	47.4091	25.7739	28.436	18.265	11.495	22.2448	2.46566	2.90558	2.39874	2.95488	1.8768	0.638139	1.57759	1.53785	2.08775	2.60818
Asymptomatic	76.4169	Male	27.8749	5.36972	N/A	Non-Smoker	3.94789	Yes	44.9254	13.8167	69.2612	48.3172	37.1625	30.3134	25.9046	29.8316	22.0105	19.7393	2.58962	3.55322	2.4525	2.49795	1.53751	2.14971	1.23845	1.05885	2.13935	2.51327
Asymptomatic	53.3805	Male	25.1245	5.95122	N/A	Non-Smoker	7.49791	No	45.8847	47.4177	64.7158	57.0285	50.4961	27.617	28.9885	16.5891	22.3442	16.7335	3.96176	1.74072	2.57263	1.88484	1.1876	1.66122	0.95313	1.5619	2.19621	2.61544
Asymptomatic	53.9314	Male	24.2364	4.53217	N/A	Non-Smoker	5.49418	No	35.4301	55.4565	52.8889	37.2688	44.0038	36.6763	39.9499	28.5463	25.2553	15.6248	1.63218	1.11796	2.26195	2.08482	1.3928	2.15549	1.41449	1.46548	2.27054	2.79571
Asymptomatic	69.9018	Male	21.9702	5.12645	N/A	Non-Smoker	5.73641	No	30.5508	43.5657	49.1495	51.5889	24.0289	41.7362	23.7176	36.3661	19.9167	16.9627	2.18992	3.54451	2.00791	2.82142	0.960561	2.15035	0.885333	1.66491	2.06154	3.47409
Asymptomatic	54.6256	Female	19.6446	4.90569	N/A	Smoker	2.41993	Yes	31.5599	41.451	52.2005	42.0639	35.8188	28.4157	33.7561	24.653	11.7231	16.0815	1.39424	1.67135	2.22837	2.96118	1.31842	1.42481	1.20905	1.27631	1.57691	2.73279
Asymptomatic	76.848	Female	27.8231	5.79108	N/A	Smoker	6.12905	Yes	45.8349	45.8181	74.3592	46.5673	43.5347	29.0008	22.0299	16.8187	15.5891	21.9189	2.27713	1.94926	2.01387	2.91305	1.21458	2.93424	1.49287	0.955766	2.36187	2.49704
Asymptomatic	60.0409	Male	23.7848	5.17502	N/A	Non-Smoker	4.43433	Yes	41.0263	42.7124	59.1465	51.8001	35.9076	30.3361	25.734	13.7402	24.8728	24.2449	3.58275	2.74211	2.98752	3.07589	1.07008	2.03988	1.36933	1.54358	2.13502	2.26886
Asymptomatic	57.6606	Male	24.0602	5.21351	N/A	Smoker	7.08725	No	37.3462	45.4309	55.5074	53.2074	35.4052	37.4213	28.7634	17.9811	21.0266	26.7818	2.7836	1.94937	2.78833	2.59239	1.49792	2.44774	1.30277	1.49753	1.62106	3.02355
Asymptomatic	76.7006	Male	31.2171	5.3302	N/A	Smoker	8.51206	Yes	49.1048	39.7928	57.9935	47.3327	45.1397	26.3029	30.8745	29.0985	23.9145	13.9163	2.2507	1.14293	2.13837	2.6537	2.24395	2.67328	0.542116	1.53292	2.26047	2.23294
Asymptomatic	73.5461	Female	27.4016	5.63488	N/A	Non-Smoker	3.22057	Yes	45.582	33.1327	67.5226	54.0097	30.3916	29.4866	38.4397	24.7829	22.6953	21.7848	2.53627	2.59043	2.42273	1.87651	1.92625	1.52401	1.07475	1.79192	2.19248	1.87039
Asymptomatic	76.3057	Male	26.2598	5.2495	N/A	Non-Smoker	2.99363	Yes	35.878	31.0725	47.3236	58.9054	35.8105	11.9996	28.4125	30.9232	19.0679	10.209	1.39553	1.86448	2.15554	2.7028	1.3355	1.42853	0.953156	1.13052	2.18722	2.00407
Asymptomatic	69.4501	Female	25.4271	4.02877	N/A	Smoker	1.94998	No	32.4548	31.1257	73.1006	49.0553	38.091	20.6759	23.2228	29.6148	19.2434	21.1874	2.03289	3.0921	2.76696	2.83571	1.6606	2.54705	1.43122	0.640205	1.91534	2.28569
Asymptomatic	56.8495	Female	30.4428	5.67992	N/A	Smoker	3.59264	Yes	45.6987	27.8757	61.2087	64.4155	33.1933	31.795	32.9913	24.6668	30.7598	25.5934	2.4065	2.10959	2.702	2.29755	1.65332	2.69606	1.31016	1.61151	2.54935	2.48658
Asymptomatic	76.6088	Female	31.1693	5.63196	N/A	Non-Smoker	3.04898	Yes	37.5514	30.5227	57.6855	64.6907	35.53	40.6453	26.3583	27.2816	22.5812	17.941	2.41755	1.94728	2.48587	2.8498	1.13984	1.17264	1.16528	1.58801	2.1985	3.18137
Asymptomatic	61.0791	Male	28.2934	5.32901	N/A	Non-Smoker	4.73967	Yes	42.4419	55.0502	63.9149	47.7103	41.4539	35.3649	30.301	38.1422	19.5009	25.5311	1.14612	2.3731	2.62207	1.74285	1.57893	3.03618	1.29861	1.2878	1.74932	2.21943
Asymptomatic	68.7115	Male	27.0293	4.93134	N/A	Smoker	3.59039	Yes	53.786	46.318	61.7939	45.8322	38.9046	23.1548	27.9799	34.6871	22.8122	11.7995	2.59555	3.49642	2.52726	2.89799	0.870063	1.80047	0.937596	1.508	1.50089	3.26631
Asymptomatic	69.7439	Female	17.2856	5.59182	N/A	Non-Smoker	3.09555	No	45.5379	34.361	56.4773	36.6157	29.6551	20.5138	16.0298	21.1804	21.4939	13.3515	2.55777	3.36803	2.75833	2.69513	1.0862	2.31048	1.25857	1.09375	1.75678	1.59375
Asymptomatic	61.8848	Male	25.3603	5.60445	N/A	Smoker	6.34725	No	35.0578	36.3953	57.3419	50.4234	27.4543	34.3102	32.0643	31.3389	7.99779	18.0266	2.0459	1.58703	2.46901	3.50977	1.44118	2.24041	1.12375	0.733893	1.22802	4.11442
Asymptomatic	67.3684	Male	24.4364	5.21378	N/A	Non-Smoker	1.78163	Yes	42.9139	40.7559	51.5192	48.2963	29.8012	18.3014	32.5552	28.1648	23.916	25.2179	2.34326	5.05174	2.29836	3.19589	1.21897	1.39576	0.679198	0.87441	1.92402	1.62401
Asymptomatic	69.5653	Male	25.252	5.3303	N/A	Non-Smoker	4.90749	Yes	34.3637	34.0964	65.9329	58.5559	35.6893	42.1175	34.8	32.492	30.5547	16.2778	1.18288	2.27006	1.97025	3.23814	1.9572	1.45477	1.18601	1.4644	2.05256	2.67687
Asymptomatic	65.6739	Male	28.3427	5.00213	N/A	Non-Smoker	2.99445	Yes	54.0335	40.3654	54.7027	38.0032	34.4884	33.3397	40.515	28.8389	15.8058	16.0534	1.18576	1.53435	1.52271	2.92783	1.58033	0.784024	1.27679	1.92012	1.61147	2.43163
Asymptomatic	55.1513	Male	14.9376	5.34785	N/A	Non-Smoker	5.57156	No	37.3671	46.5218	50.6934	49.069	29.4819	18.6999	20.924	15.903	28.4744	12.712	2.44506	3.35053	2.21747	2.85098	1.23011	1.29687	1.39835	1.31756	1.83	2.09666
Asymptomatic	65.1164	Female	22.8377	4.7168	N/A	Non-Smoker	7.0784	Yes	43.2718	39.4701	61.2974	60.2593	31.2238	24.3182	32.118	10.8293	18.7735	20.1299	1.81918	2.23811	1.89653	2.02827	1.2	1.11464	1.23185	1.72674	2.52258	2.95908
Asymptomatic	72.4471	Male	25.8925	5.62197	N/A	Non-Smoker	3.22894	No	44.0434	42.6933	72.2904	45.0014	24.3557	26.435	31.4168	28.0608	21.894	26.612	2.33099	4.47681	2.257	2.40921	1.42357	1.9521	1.35168	1.24793	2.04541	3.18376
Asymptomatic	58.0377	Male	23.2107	4.99559	N/A	Smoker	4.92556	Yes	42.903	47.4659	59.2731	44.714	38.793	26.0068	25.9992	38.5146	26.2989	23.2212	2.9948	3.31419	2.74322	3.38203	1.00112	2.68317	0.666918	1.43115	2.51666	2.45841
Asymptomatic	61.9231	Male	19.7525	5.53953	N/A	Non-Smoker	4.32765	No	26.6383	37.4206	53.9834	38.5665	35.3819	19.7282	31.3371	17.4633	16.1476	23.1962	2.20433	2.38314	2.30777	1.90473	1.56251	1.91507	1.00665	1.72083	1.94897	3.27354
Asymptomatic	59.8874	Female	28.073	4.78326	N/A	Non-Smoker	2.09732	Yes	30.5715	42.2491	63.5468	75.0928	26.2946	25.118	32.0077	22.0816	27.2749	17.5847	0.147679	3.96202	2.04325	2.35737	0.892397	2.11637	1.06437	1.49528	1.95166	2.59779
Asymptomatic	76.1753	Female	25.9178	5.15857	N/A	Non-Smoker	4.469	Yes	38.2059	37.0977	78.0319	44.8477	35.8932	26.7846	20.7698	15.419	13.3454	15.3718	2.22249	3.31571	1.84609	1.92134	1.57182	2.3579	1.01756	1.26583	1.28425	1.93237
Asymptomatic	67.7835	Female	21.3752	5.37917	N/A	Smoker	4.57919	Yes	44.1332	39.5327	46.0095	39.8829	45.6825	26.5491	30.3503	32.8177	15.2679	23.0757	1.96479	1.46628	1.58644	3.21293	1.30404	2.30384	1.07774	1.1558	2.25067	2.51328
Asymptomatic	65.8952	Male	26.0559	4.66608	N/A	Non-Smoker	4.86135	Yes	40.6219	36.9646	63.3418	44.3414	30.1675	42.6609	22.7364	5.44139	16.8647	18.6718	2.15694	3.35067	2.82976	2.3054	1.50097	1.71779	0.955651	1.41854	2.37318	2.24878
Asymptomatic	57.5005	Male	27.9006	5.48297	N/A	Non-Smoker	3.46765	Yes	34.3291	35.1947	61.6681	44.6068	45.4778	33.6983	24.4769	5.76763	23.9836	17.7919	3.04179	2.10033	1.43049	3.25504	1.01572	1.12516	1.28404	1.85191	1.89702	2.83153
Asymptomatic	66.8348	Male	24.9293	5.25559	N/A	Non-Smoker	4.13476	No	31.3241	41.2861	70.7065	49.1409	33.2702	24.0791	17.1332	26.5077	18.2972	24.4481	1.10875	2.48584	1.80935	2.37381	1.44329	1.69361	0.852199	0.915977	1.9076	2.32449
Asymptomatic	58.182	Female	27.8241	4.62852	N/A	Non-Smoker	1.30345	No	38.596	44.6919	69.0941	58.9718	37.1538	29.8487	25.6442	22.9128	11.6117	17.6417	2.53029	2.67664	1.18906	2.33314	2.1802	1.96463	1.13129	1.74217	2.2783	2.51623
Asymptomatic	63.217	Female	25.1949	4.83051	N/A	Smoker	3.1035	Yes	38.0821	41.0485	57.9656	48.8811	36.4082	25.0751	27.4086	19.7902	19.0023	13.6674	3.56484	1.7776	2.08774	3.13534	1.20455	1.4506	1.11829	1.54644	1.76702	1.91964
Asymptomatic	58.4564	Male	23.4714	5.70836	N/A	Non-Smoker	5.18759	Yes	45.6186	44.104	43.8113	43.273	46.1213	30.1519	32.3361	21.1934	15.7835	24.5161	1.85176	1.37333	2.07597	2.98247	1.46792	2.12908	1.13598	1.1205	1.75183	3.19092
Asymptomatic	67.813	Male	20.6897	5.84196	N/A	Non-Smoker	5.95484	Yes	39.1739	33.3821	67.352	38.527	36.8603	40.4495	28.7459	27.7807	24.3764	19.3713	2.70842	2.88733	2.04807	1.33767	1.87189	1.76901	0.863069	1.44375	2.11464	2.35018
Asymptomatic	67.1011	Male	24.5972	5.36932	N/A	Smoker	2.95712	Yes	46.3088	29.3436	51.8374	51.7563	27.1728	34.9899	18.6534	20.3075	18.2839	12.43	3.09372	1.32447	2.20159	2.76301	1.61898	2.272	1.44981	1.38063	1.80994	1.92901
Asymptomatic	61.5048	Female	25.6172	5.61619	N/A	Non-Smoker	4.15875	Yes	37.1131	43.3958	50.7833	51.942	25.9133	52.8019	34.3784	14.9382	20.6313	11.9589	2.50398	0.26807	1.86043	2.83008	1.50684	1.48822	1.04347	1.12777	2.21165	4.11257
Asymptomatic	65.8135	Male	28.098	5.53297	N/A	Smoker	4.43996	Yes	39.7142	45.7439	70.5819	65.3078	24.2597	36.0731	27.9644	16.2709	17.931	19.4625	1.80562	1.81587	1.81885	2.65441	1.01535	1.42292	0.740286	1.26659	1.7063	1.72635
Asymptomatic	55.1965	Female	24.491	5.58163	N/A	Non-Smoker	4.37937	No	39.007	40.2123	51.1225	52.3902	22.9258	24.7769	31.9339	30.5423	22.6904	33.3853	1.78657	2.85467	3.04802	2.26405	0.92562	2.90573	1.30033	1.02286	2.50814	2.85938
Asymptomatic	52.3573	Female	26.575	6.02155	N/A	Non-Smoker	5.15296	Yes	35.6714	51.4675	72.9869	50.6709	36.0237	39.8733	35.0572	19.4355	19.189	16.4306	2.92016	2.31981	2.07967	2.57278	1.37817	1.94582	1.09917	0.745682	2.22663	1.28344
Asymptomatic	66.1229	Male	21.3988	4.73678	N/A	Non-Smoker	-0.225217	Yes	46.4809	47.6497	62.9037	42.1251	28.5401	42.2402	38.0438	12.6717	22.0739	16.7817	2.80188	3.68775	2.63845	2.38087	1.2025	2.23413	1.07576	1.50142	2.03173	2.74203
Asymptomatic	64.1784	Female	22.0612	5.74117	N/A	Non-Smoker	3.80754	No	35.4316	63.0205	62.7457	48.8125	35.078	42.3649	41.5664	24.3631	5.52549	28.3326	1.72655	2.72354	1.85345	2.6551	1.35352	1.32587	1.07603	1.80513	1.7217	2.67099
Asymptomatic	67.5178	Male	24.5082	5.25428	N/A	Non-Smoker	4.465	Yes	37.6738	38.039	62.6337	47.6225	30.4363	23.1944	28.2676	27.5293	20.7814	18.5143	1.42235	1.87798	2.95573	2.46892	1.42992	1.7225	1.19886	2.00534	1.66094	2.4111
Asymptomatic	79.9818	Female	21.0712	5.32684	N/A	Non-Smoker	1.63925	No	41.1184	31.12	44.2469	48.2359	29.9377	31.4867	30.7748	34.0056	22.5769	9.87502	1.34097	2.16877	2.91138	2.28013	1.13001	2.30519	1.08669	1.07213	1.71391	1.75551
Asymptomatic	69.7241	Male	27.8957	5.29097	N/A	Non-Smoker	7.73669	Yes	31.7161	33.363	42.9431	42.9459	32.0977	42.6947	21.6875	25.2727	19.1001	9.10293	3.63609	1.28148	2.33396	2.6337	1.528	2.79109	0.906625	2.1801	1.53737	2.05347
Asymptomatic	56.4816	Female	26.5958	5.25743	N/A	Non-Smoker	4.28836	No	39.1845	34.8771	61.767	56.3942	40.9217	18.0218	35.6829	18.3747	24.0255	26.4876	2.287	3.52636	1.73521	2.9211	1.99191	1.53153	0.745204	1.96894	2.45234	2.08413
Asymptomatic	70.9543	Female	25.9259	4.86595	N/A	Non-Smoker	7.48456	Yes	36.2172	43.9072	65.0977	50.2808	42.6021	28.4051	20.9908	27.2857	24.4179	23.0081	4.18098	1.33082	2.26915	2.69005	1.01682	1.4884	1.17586	1.93398	2.12288	1.86727
Asymptomatic	53.6076	Female	26.1436	5.51434	N/A	Non-Smoker	2.11761	Yes	38.699	21.0695	60.5107	49.7608	38.4452	20.28	16.9337	29.2756	27.6249	24.0002	2.77333	1.74084	2.25129	2.31086	1.20035	1.91753	0.720448	1.18287	2.36331	2.00065
Asymptomatic	59.6989	Male	32.2666	6.19863	N/A	Smoker	1.85136	Yes	41.2198	51.2118	51.9665	36.1679	28.3058	24.6107	34.1707	23.2542	20.8243	18.5113	2.68283	2.41735	2.33783	2.71131	1.34313	1.09158	1.37993	1.25883	2.58389	3.40672
Asymptomatic	62.5034	Female	23.2033	5.40418	N/A	Non-Smoker	4.4313	Yes	35.5367	37.7053	59.9088	55.9929	40.4751	23.9109	25.3281	23.2094	9.37875	14.3571	2.57889	2.56209	1.7898	3.04141	1.74776	1.91343	0.861535	0.790958	2.44118	2.79081
Asymptomatic	75.2061	Female	16.8968	5.42936	N/A	Non-Smoker	0.0925905	Yes	39.9898	37.6403	58.9548	55.9334	40.8123	43.735	33.8256	25.6046	7.27122	17.5214	3.11934	1.22264	1.54465	3.27793	0.95663	1.8944	0.887596	1.51499	2.15837	3.34519
Asymptomatic	57.6799	Male	25.6355	5.11384	N/A	Smoker	4.41012	No	51.7306	30.4221	50.6849	44.0246	37.7261	30.7254	31.4088	23.0109	11.1476	19.7148	1.58647	1.75407	2.30306	3.1034	0.99785	2.32861	0.854525	1.31618	1.87435	1.97658
Asymptomatic	57.0975	Male	24.7258	5.37596	N/A	Non-Smoker	4.14166	Yes	41.4819	38.7897	69.312	60.4513	31.183	25.217	18.0798	25.5259	20.0151	13.6641	4.02481	2.79589	2.22537	2.80182	0.624355	2.70804	0.759231	1.50501	2.25727	2.30553
Asymptomatic	62.288	Female	23.0262	5.64444	N/A	Non-Smoker	6.23572	No	50.4756	39.8948	43.3789	39.3045	40.961	23.7081	10.9533	15.5278	19.3381	22.3566	2.26176	3.56545	2.23093	2.10589	1.21028	2.24341	0.90685	1.16626	2.07968	1.53514
Asymptomatic	58.2594	Female	21.3471	5.25969	N/A	Smoker	5.51837	No	44.3411	38.7227	65.2936	51.3636	38.83	34.021	21.5682	14.5176	21.7963	11.0479	1.79135	2.87061	2.69206	1.9455	1.59125	2.33785	1.02909	1.67878	1.92399	1.85763
Asymptomatic	71.0229	Male	23.3114	5.22125	N/A	Non-Smoker	2.96815	Yes	47.6256	42.7196	63.3619	49.1246	12.4594	32.6825	28.8479	16.9882	16.6849	16.8036	2.576	2.53703	1.56618	2.46893	1.72218	1.95875	0.518099	1.56668	1.83998	2.38824
Asymptomatic	55.2901	Female	25.5701	5.6155	N/A	Non-Smoker	1.41771	No	35.7322	34.6679	69.2718	39.7318	40.4812	44.5541	20.7496	28.6078	16.0541	17.6031	3.19202	1.16946	2.68481	1.92587	1.48143	1.73214	0.488693	1.061	2.36614	2.31184
Asymptomatic	54.8085	Female	23.0797	5.00772	N/A	Non-Smoker	7.82406	Yes	42.4857	32.0133	50.2298	53.2635	21.4226	37.1601	24.4709	25.5941	23.3771	14.5788	1.55411	2.01057	1.89555	2.20685	1.15567	0.832213	0.921034	1.4344	2.49756	3.60864
Asymptomatic	59.8683	Male	33.6913	5.54615	N/A	Smoker	2.11398	No	42.7085	44.534	60.6883	66.8491	40.6235	20.2375	19.1985	31.7363	23.9491	5.17381	2.78216	3.02413	2.05215	2.48344	1.6002	1.44258	1.32085	1.54679	1.91921	2.62375
Asymptomatic	59.439	Female	21.4138	5.80735	N/A	Non-Smoker	1.5362	Yes	36.975	40.6354	80.2475	52.1674	34.5322	27.2701	29.851	22.0926	18.7748	21.6513	1.78117	3.52204	1.8584	2.34211	1.42947	2.0495	0.77489	2.13287	1.86579	2.40359
Asymptomatic	76.7476	Female	22.0231	6.05558	N/A	Non-Smoker	1.44653	No	35.3607	41.4896	65.9866	47.4021	44.5724	42.1538	29.334	14.571	20.0118	14.1768	1.94511	3.35154	2.27033	2.41244	0.70696	1.02492	1.08092	1.48257	2.2404	2.83108
Asymptomatic	69.7594	Female	16.5794	5.38842	N/A	Non-Smoker	6.46746	No	30.2348	48.9618	60.6805	55.5743	34.9487	27.3393	25.5917	32.5562	22.5225	27.1026	1.9582	2.68288	1.37238	1.9624	0.942448	2.06359	1.45764	1.13026	1.80039	2.57586
Asymptomatic	63.6142	Female	25.8254	6.05909	N/A	Non-Smoker	2.73691	No	53.1704	30.9144	64.8251	52.5094	29.0747	47.9749	37.8768	23.4125	23.0896	16.7463	2.93556	3.63209	1.97436	2.66416	1.87403	1.70954	0.769148	1.34247	2.20921	1.91943
Asymptomatic	54.2526	Female	17.5703	5.90583	N/A	Non-Smoker	2.20155	Yes	34.2119	32.3651	60.5444	51.8093	34.5822	23.159	38.5351	33.648	13.7436	15.5082	1.47492	5.1245	1.99791	3.00843	1.46955	1.36814	0.990411	1.43938	2.58319	2.19014
Asymptomatic	69.0103	Male	22.9464	4.97174	N/A	Smoker	4.23393	Yes	52.019	50.6801	80.434	47.7386	43.5756	37.7961	32.4368	28.2599	16.15	19.4384	2.49024	2.03146	2.79877	2.31334	0.89257	1.67149	0.914212	1.40458	1.87211	3.38538
Asymptomatic	55.8585	Female	23.9066	4.86975	N/A	Non-Smoker	3.44817	Yes	38.0897	26.9234	69.0254	64.3293	35.8755	25.2358	16.9695	40.7625	13.2528	25.4119	2.07213	1.88083	2.29781	2.88659	1.63878	2.33083	1.32299	0.8239	2.01809	3.32923
Asymptomatic	51.9758	Male	22.3266	5.28972	N/A	Non-Smoker	2.37394	No	35.0561	28.4274	58.9209	55.6581	34.8282	28.3159	21.5153	21.8326	17.3558	15.3712	1.67918	3.91145	2.54298	3.75823	1.72089	2.41703	1.21597	1.33726	2.6666	2.71177
Asymptomatic	71.4607	Male	31.2395	5.90331	N/A	Non-Smoker	5.6391	Yes	46.4609	46.8709	62.1145	46.8125	41.2195	42.4036	31.4026	30.6397	24.8359	25.1715	1.39345	2.76956	2.23267	2.51869	1.21209	0.864638	1.25442	1.21427	1.88685	3.1615
Asymptomatic	65.2498	Male	28.5296	5.39675	N/A	Non-Smoker	6.34892	No	36.8324	41.8452	56.037	50.5901	37.2472	31.6669	24.6292	30.5661	23.3274	27.8143	1.40175	2.65995	1.75799	2.85304	1.58361	1.84778	1.7241	1.36143	2.05654	3.52926
Asymptomatic	69.5557	Male	29.7117	5.1537	N/A	Smoker	6.16652	No	46.0458	40.6924	71.1631	44.907	35.6358	39.9058	25.5544	19.1967	14.0038	25.0199	1.06564	2.90921	2.63824	2.64855	0.0883658	2.43264	1.50737	2.17113	1.6992	2.29938
Asymptomatic	65.2625	Female	21.698	6.14403	N/A	Non-Smoker	5.66858	Yes	39.124	38.9853	46.4423	46.0975	45.8571	36.926	34.6192	22.2043	23.1346	28.9701	3.03901	1.97751	1.84955	2.99633	1.69102	1.78816	1.07524	1.16702	1.77806	2.66875
